# Supplementary material
Source: MDPI journal article supplement (https://www.mdpi.com/2624-8549/5/2/89)

# Multiple Intramolecular Hydrogen Bonding in Large Biomolecules: DFT Calculations and Deuterium Isotope Effects on $^{13}\text{C}$ Chemical Shifts as a Tool in Structural Studies

Poul Erik Hansen <sup>1,\*</sup> and Fadhil S. Kamounah <sup>2</sup>

<sup>1</sup> Department of Science and Environment, Roskilde University, DK-4000 Roskilde, Denmark

<sup>2</sup> Department of Chemistry, University of Copenhagen, Universitetsparken 5, DK-2100 Copenhagen Ø, Denmark

\* Correspondence: poulerik@ruc.dk

Table S1. Center Atomic Atomic Coordinates (Angstroms)  
Number Number Type X Y Z

| Number | Number | Type | X         | Y         | Z         |
|--------|--------|------|-----------|-----------|-----------|
| 1      | 6      | 0    | -0.581627 | 1.390046  | -0.194309 |
| 2      | 6      | 0    | 0.615643  | 2.075067  | -0.416665 |
| 3      | 6      | 0    | 1.857150  | 1.374383  | -0.364891 |
| 4      | 6      | 0    | 1.884942  | -0.033754 | -0.144182 |
| 5      | 6      | 0    | 0.653453  | -0.728971 | -0.008602 |
| 6      | 6      | 0    | -0.572635 | -0.024695 | -0.029125 |
| 7      | 6      | 0    | 3.108671  | 2.138289  | -0.570093 |
| 8      | 6      | 0    | 3.183300  | -0.673119 | -0.091082 |
| 9      | 6      | 0    | 4.351381  | 0.111603  | -0.268463 |
| 10     | 6      | 0    | 4.371358  | 1.468680  | -0.504953 |
| 11     | 6      | 0    | 5.638080  | 2.257205  | -0.698411 |
| 12     | 1      | 0    | 6.519533  | 1.629359  | -0.547234 |
| 13     | 1      | 0    | 5.692203  | 2.686778  | -1.707210 |
| 14     | 1      | 0    | 5.687168  | 3.100859  | 0.000639  |
| 15     | 8      | 0    | 0.570440  | 3.394134  | -0.699229 |
| 16     | 8      | 0    | 3.068283  | 3.394424  | -0.798614 |
| 17     | 8      | 0    | 5.501108  | -0.625315 | -0.201299 |
| 18     | 8      | 0    | 0.581762  | -2.074724 | 0.123564  |
| 19     | 7      | 0    | -1.806353 | 2.097340  | -0.202056 |
| 20     | 6      | 0    | -1.781905 | -0.829605 | 0.105835  |
| 21     | 6      | 0    | 3.606538  | -2.000954 | 0.131859  |
| 22     | 8      | 0    | 2.966080  | -3.061375 | 0.336946  |
| 23     | 1      | 0    | 1.486880  | -2.505858 | 0.223536  |
| 24     | 1      | 0    | -2.599345 | 1.540424  | -0.514594 |
| 25     | 1      | 0    | 1.543354  | 3.661736  | -0.796059 |
| 26     | 6      | 0    | 5.148529  | -2.001812 | 0.097523  |
| 27     | 6      | 0    | 5.718415  | -2.895455 | -0.995855 |
| 28     | 1      | 0    | 5.460725  | -3.936710 | -0.782030 |
| 29     | 1      | 0    | 5.287753  | -2.617846 | -1.962191 |
| 30     | 1      | 0    | 6.805002  | -2.797689 | -1.065132 |
| 31     | 8      | 0    | 5.563778  | -2.328170 | 1.395646  |

32 6 0 6.974888 -2.361590 1.626392  
33 1 0 7.097624 -2.461777 2.706817  
34 1 0 7.449081 -3.218494 1.133909  
35 1 0 7.455406 -1.435350 1.293439  
36 1 0 -1.630062 -1.876018 0.368459  
37 7 0 -2.982958 -0.399520 -0.092684  
38 6 0 -5.090791 -0.914389 0.830194  
39 6 0 -4.415049 -1.884150 -1.253931  
40 6 0 -6.130003 -2.004137 1.053388  
41 1 0 -5.545379 -0.043068 0.327099  
42 1 0 -4.737336 -0.581960 1.809743  
43 6 0 -5.429910 -3.009874 -1.111322  
44 1 0 -4.840554 -1.044757 -1.831663  
45 1 0 -3.562752 -2.273890 -1.816500  
46 1 0 -7.004979 -1.617013 1.577798  
47 1 0 -5.711285 -2.844298 1.611020  
48 1 0 -5.821626 -3.318371 -2.081856  
49 1 0 -4.994134 -3.870839 -0.600876  
50 1 0 -7.072243 -1.801746 -0.775553  
51 7 0 -3.957815 -1.458095 0.075479  
52 7 0 -6.606835 -2.564421 -0.269926  
53 6 0 -7.617415 -3.658858 -0.089108  
54 1 0 -8.456223 -3.264538 0.483997  
55 1 0 -7.951980 -3.988327 -1.072728  
56 1 0 -7.143643 -4.481333 0.446469  
57 6 0 -2.091830 3.150493 0.642577  
58 8 0 -1.288717 3.597475 1.460075  
59 6 0 -3.476622 3.731844 0.473729  
60 6 0 -3.862011 4.664517 1.353981  
61 1 0 -4.837949 5.137500 1.291707  
62 1 0 -3.199565 4.974188 2.155592  
63 6 0 -4.363216 3.274393 -0.660076  
64 1 0 -3.869575 3.397420 -1.631478  
65 1 0 -4.632066 2.213666 -0.569229  
66 1 0 -5.294170 3.848276 -0.674761

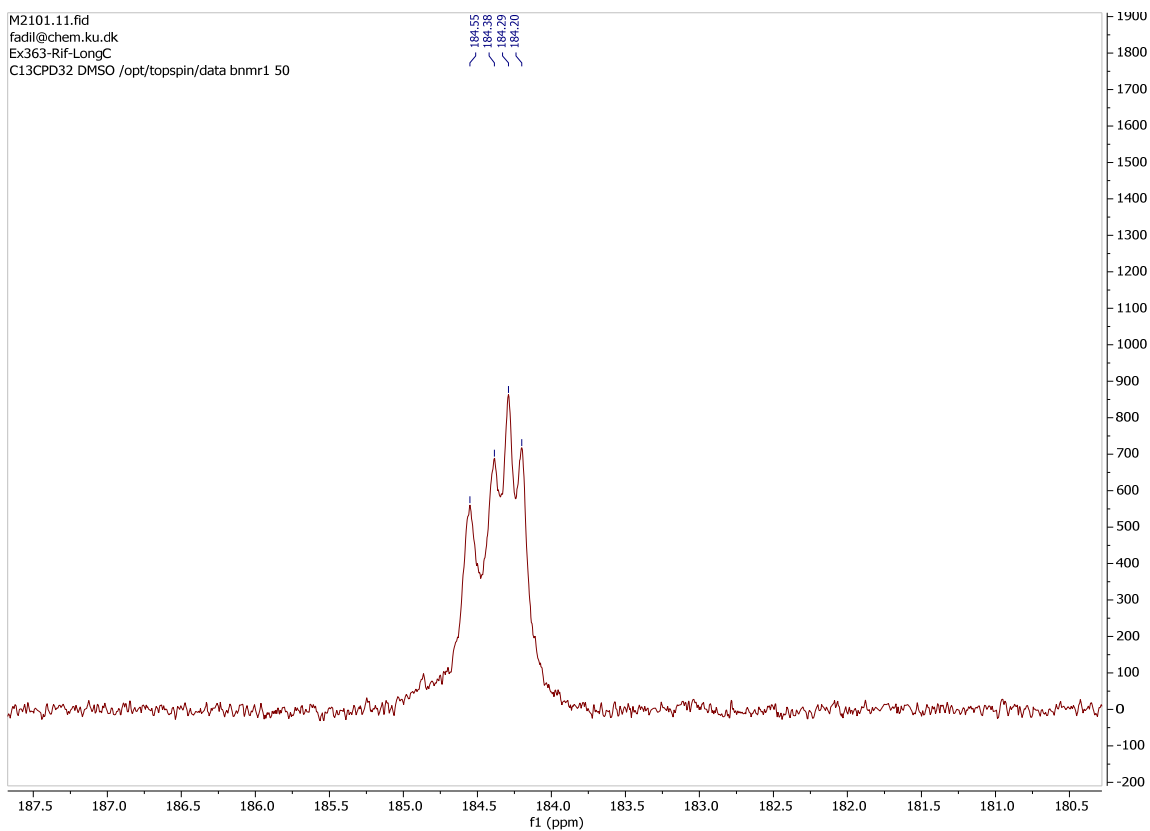

**Figure S1. Expanded spectra of  $^{13}\text{C}$  NMR spectrum of rifampicin.**

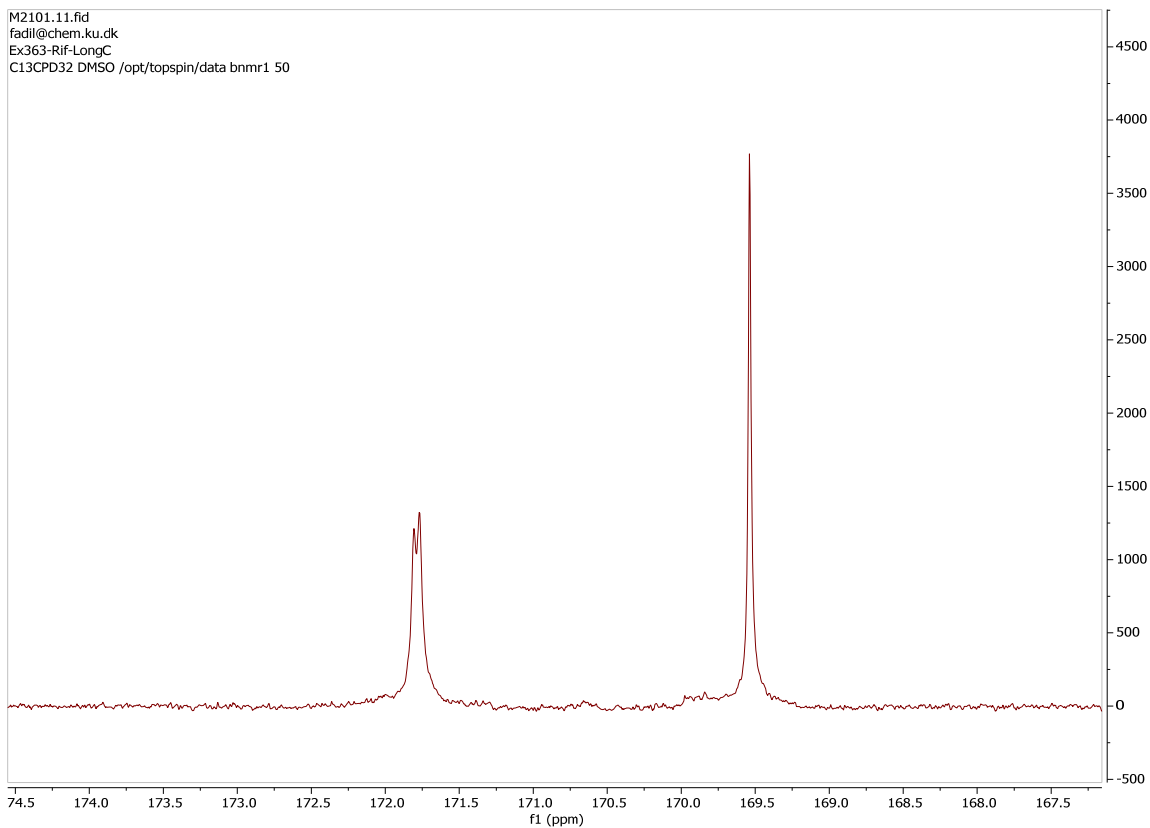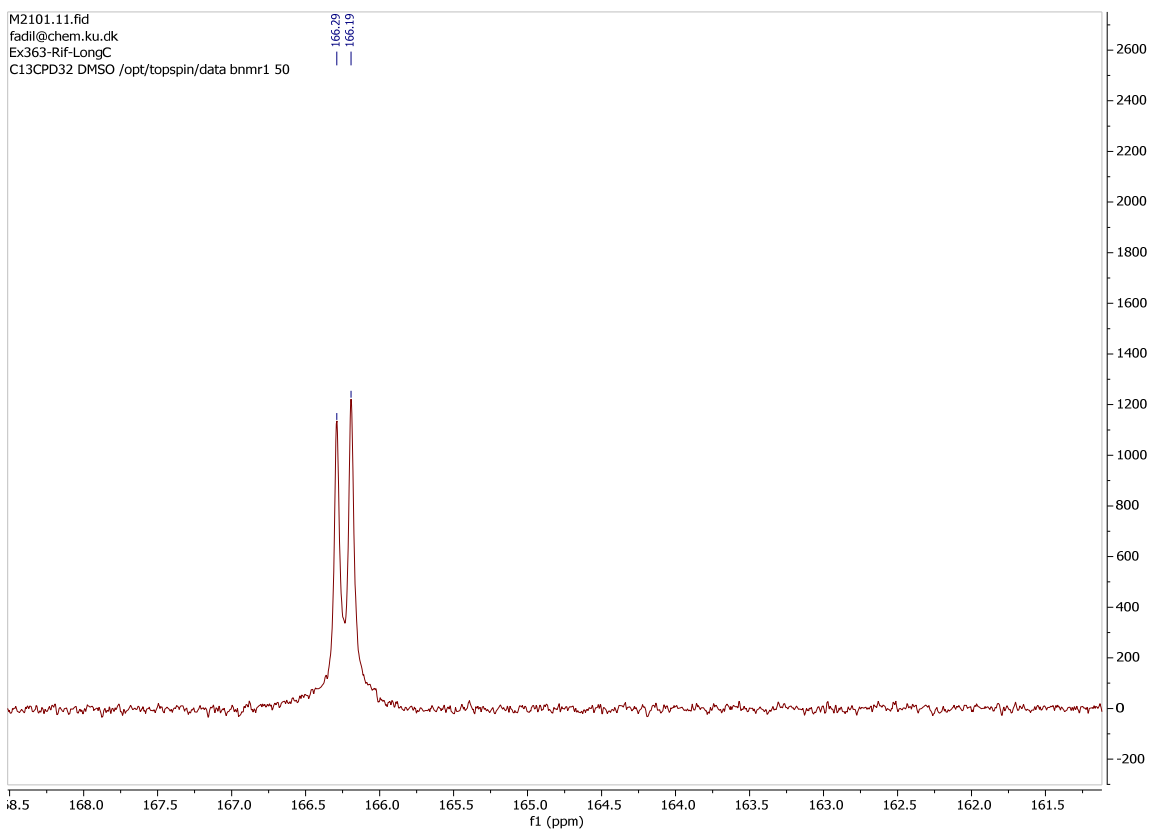

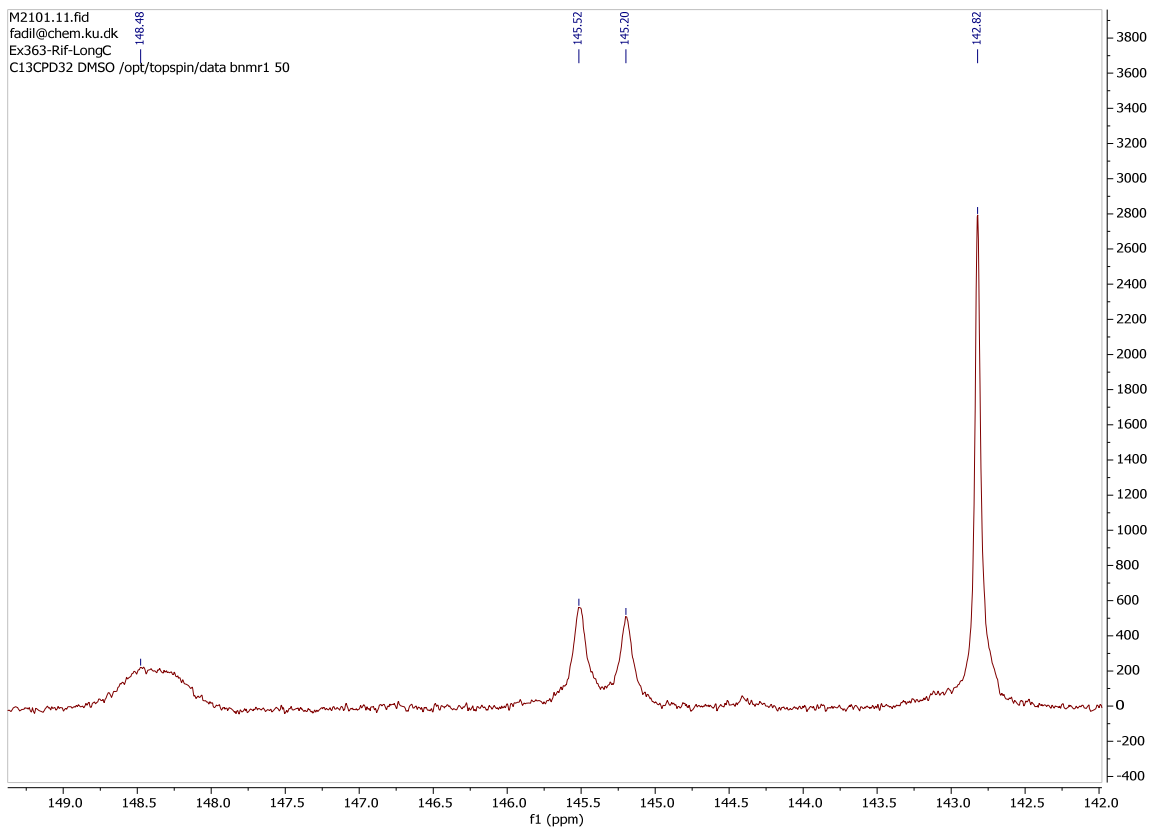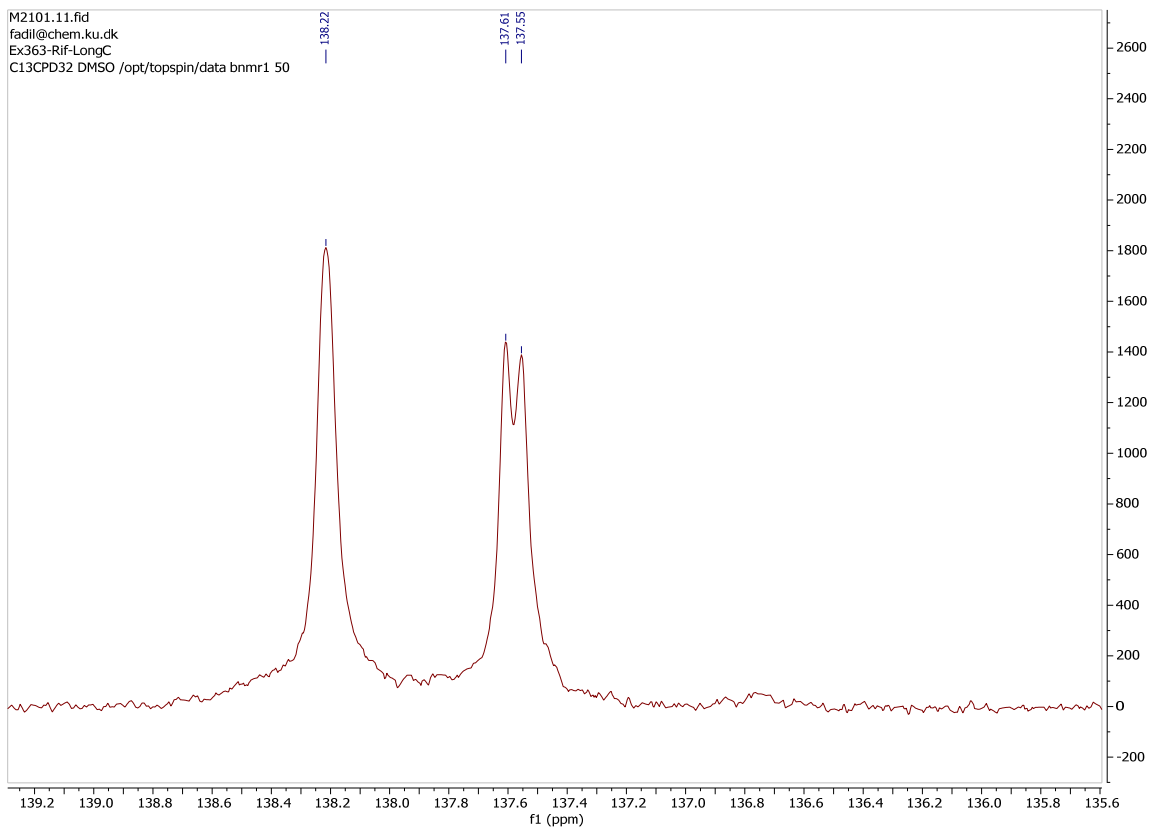

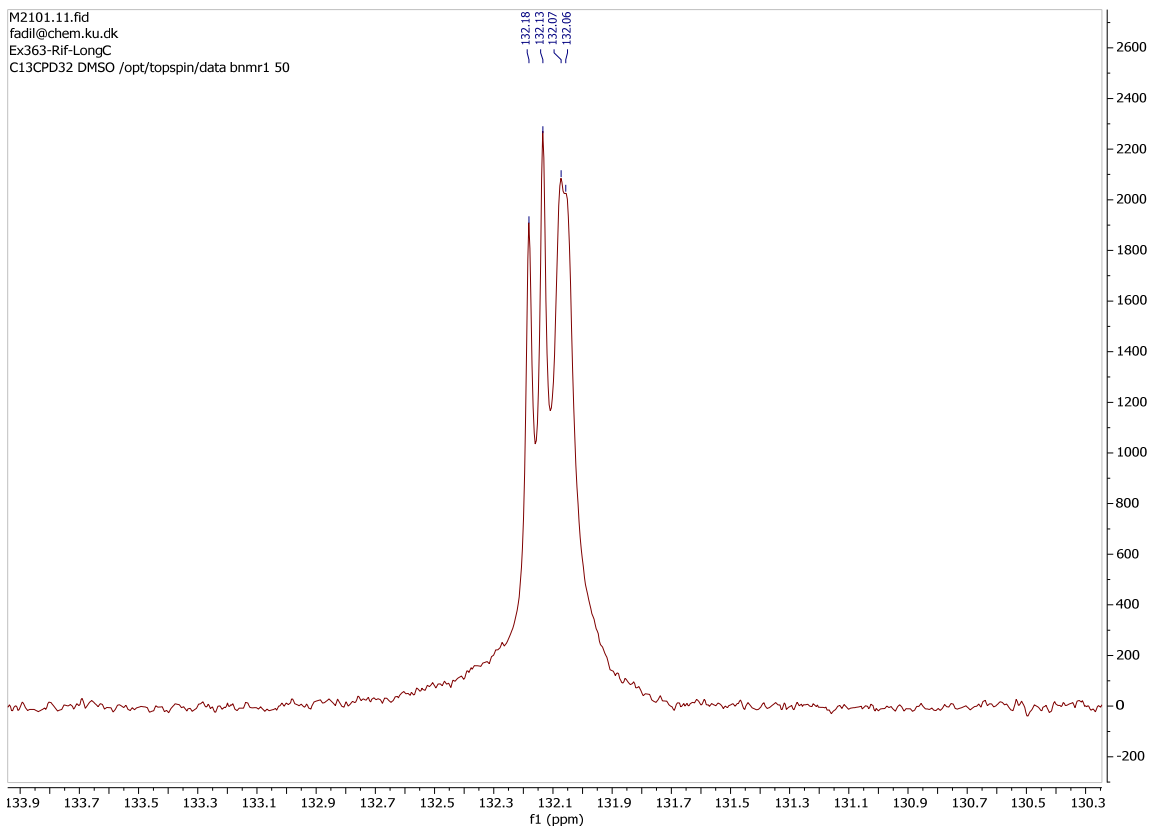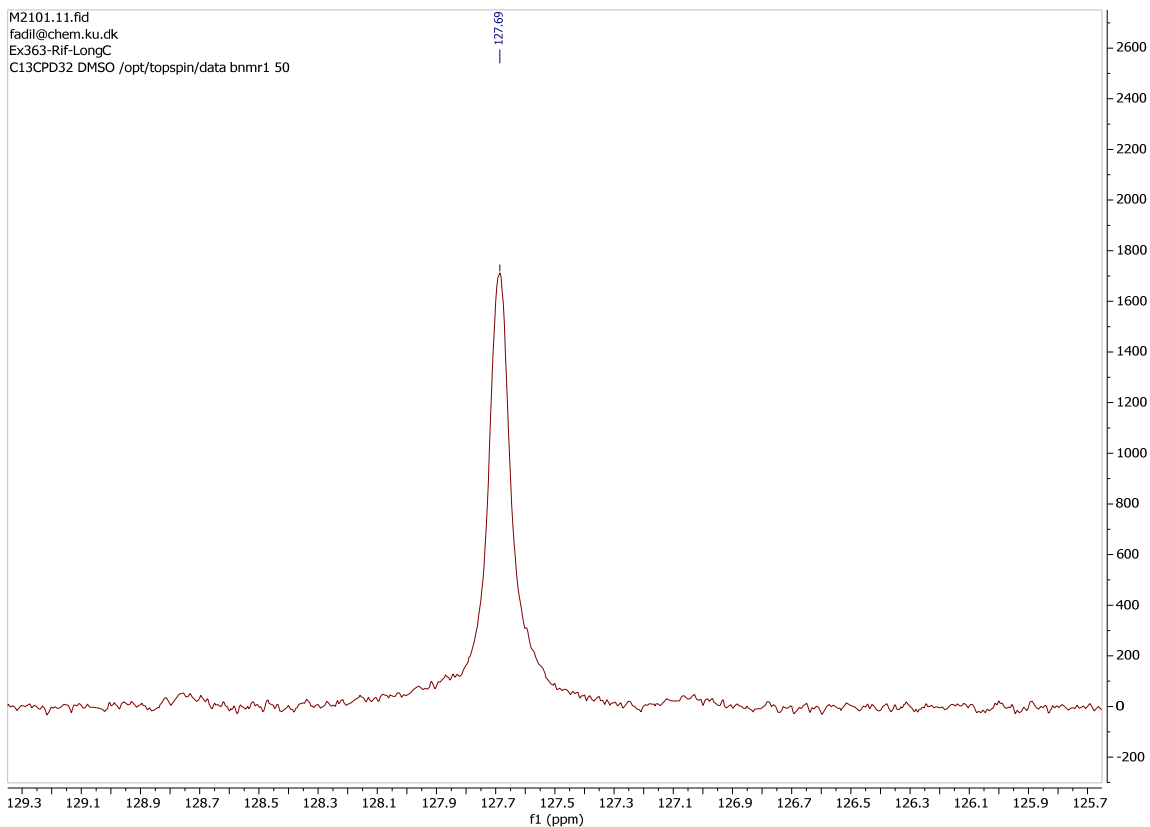

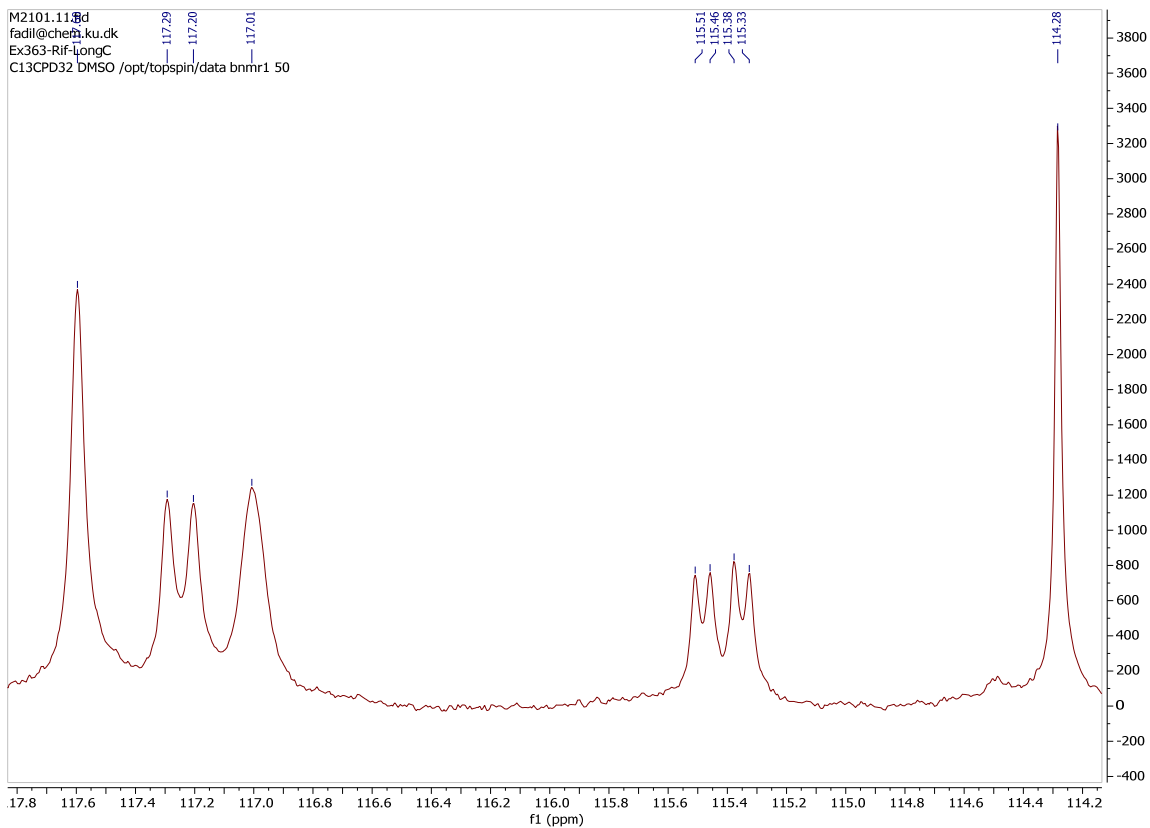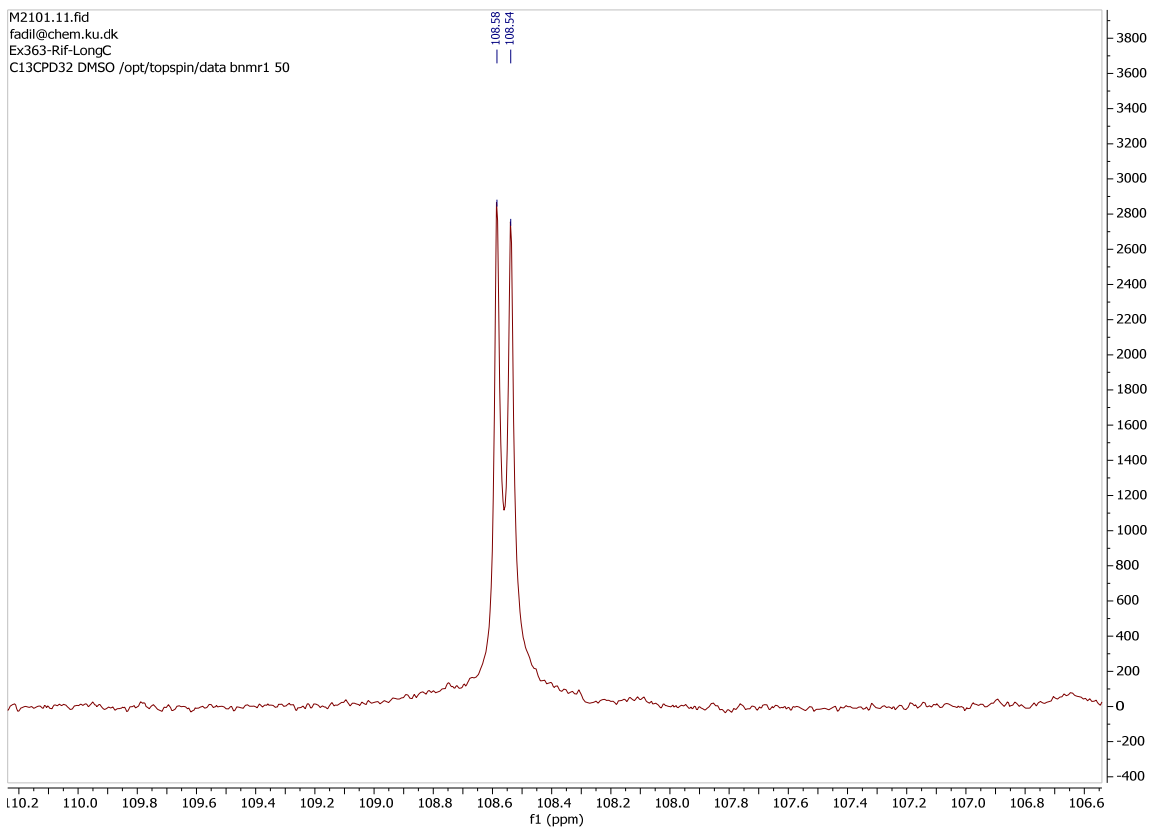

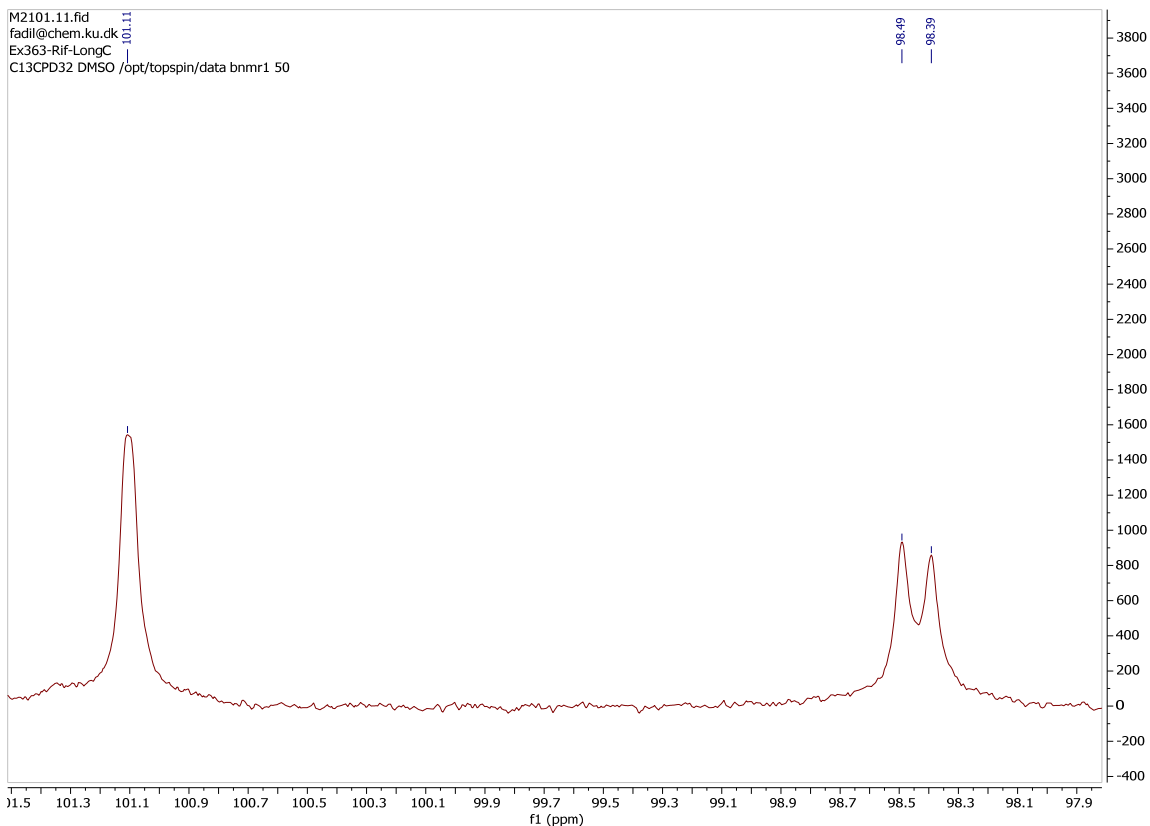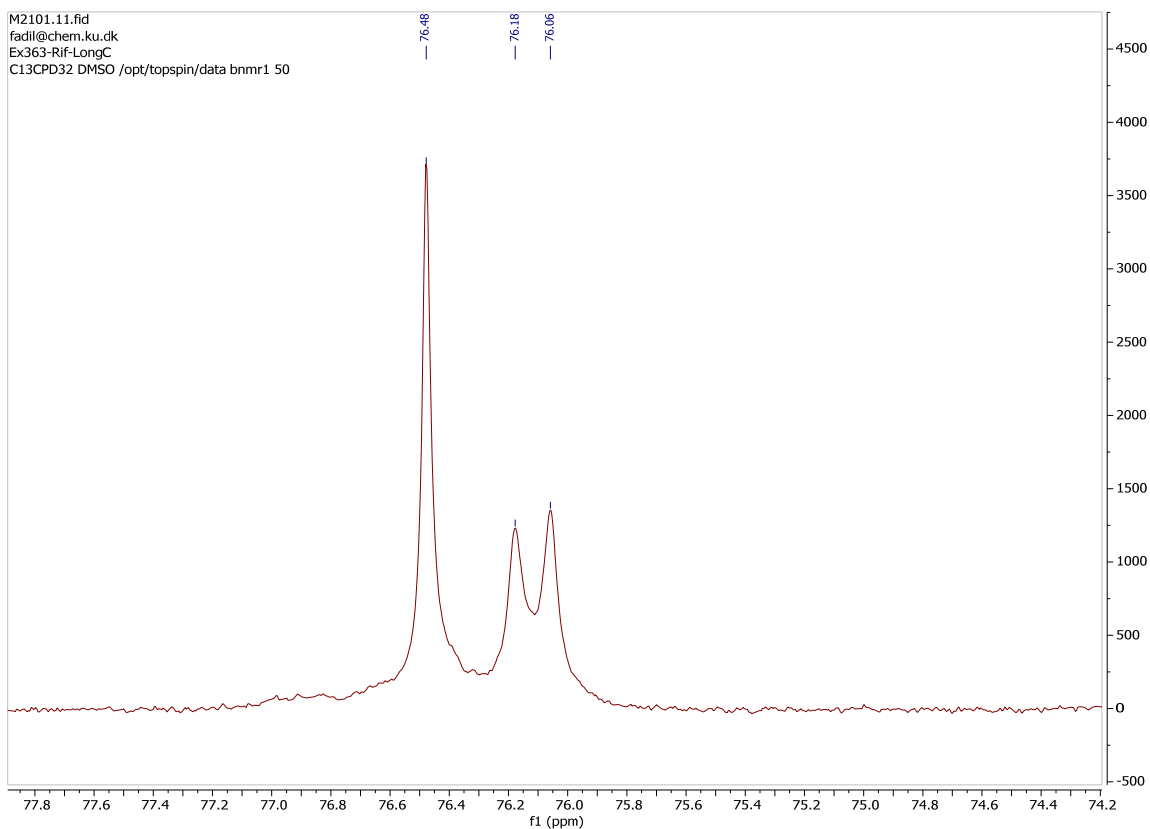



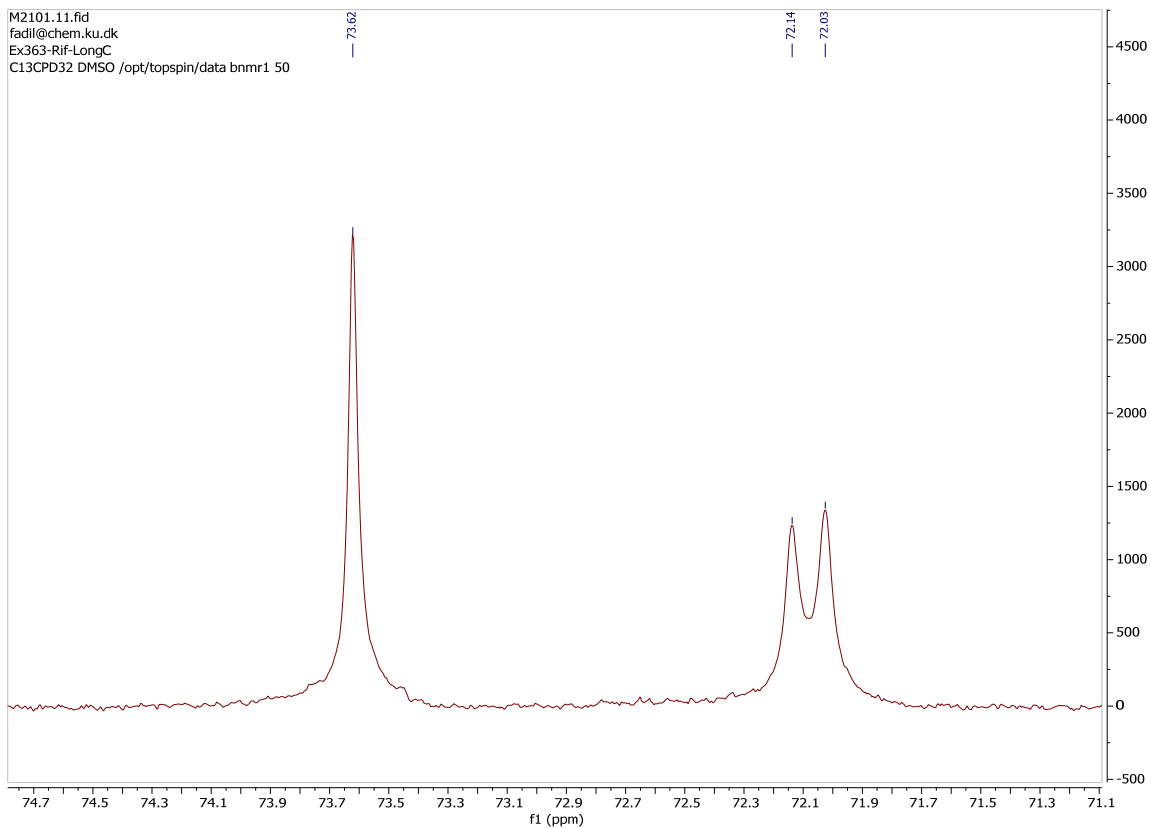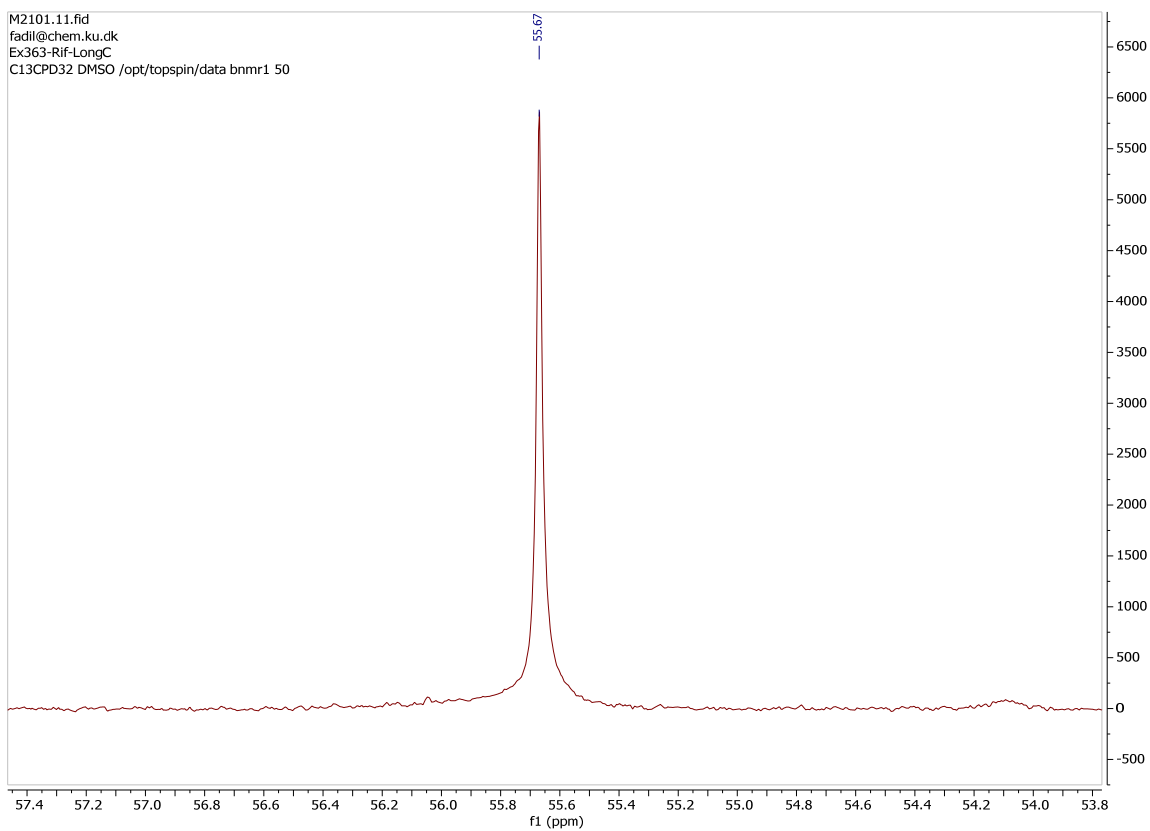

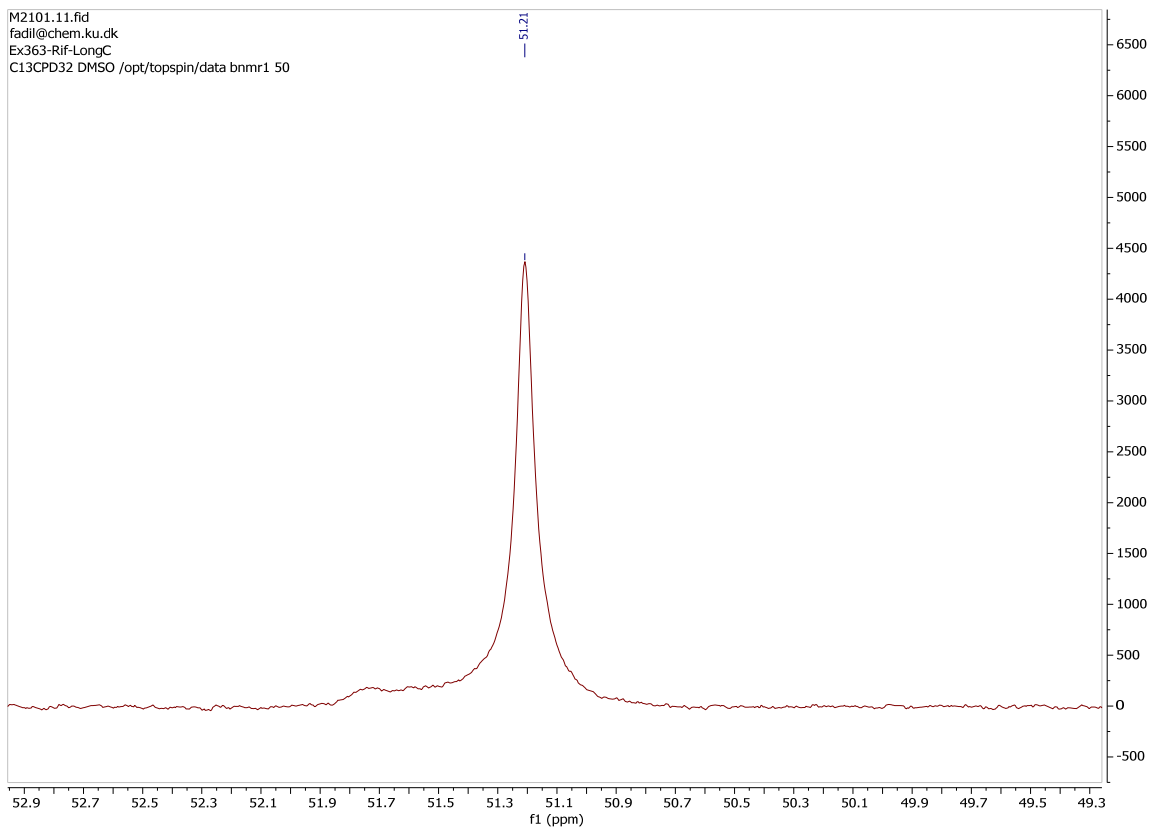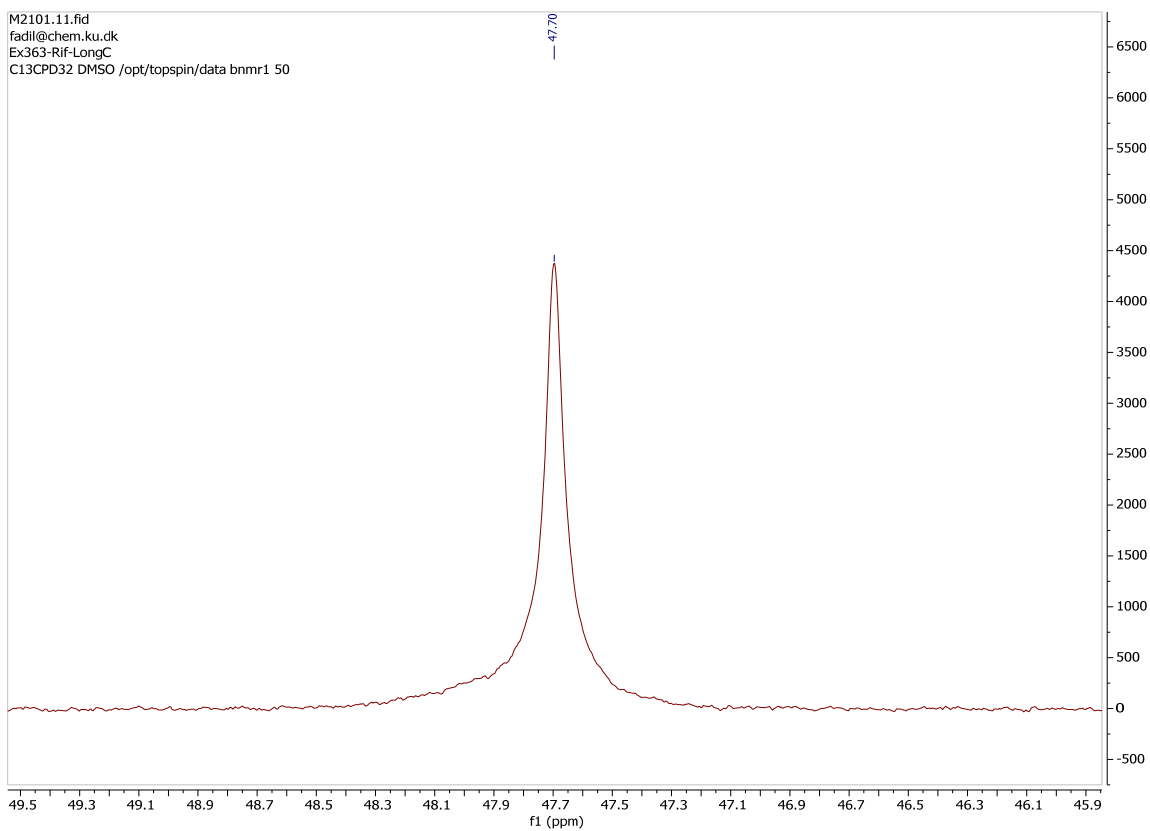

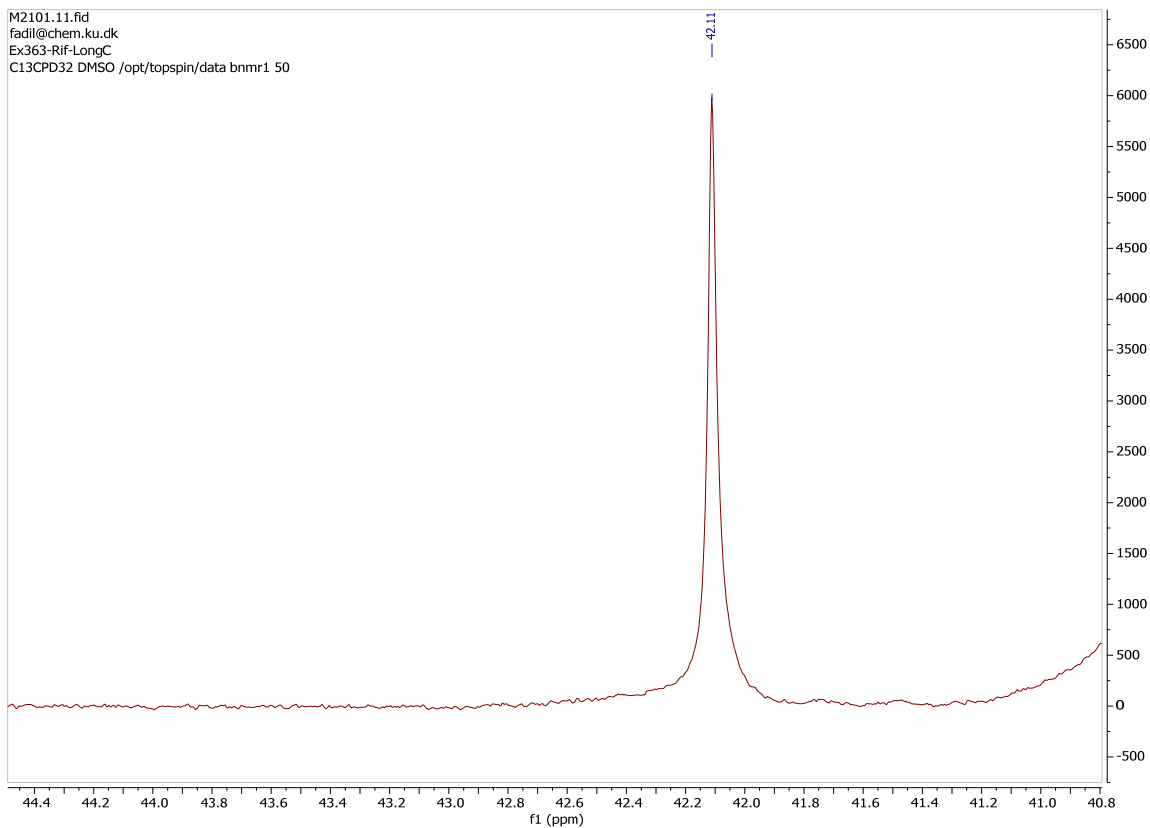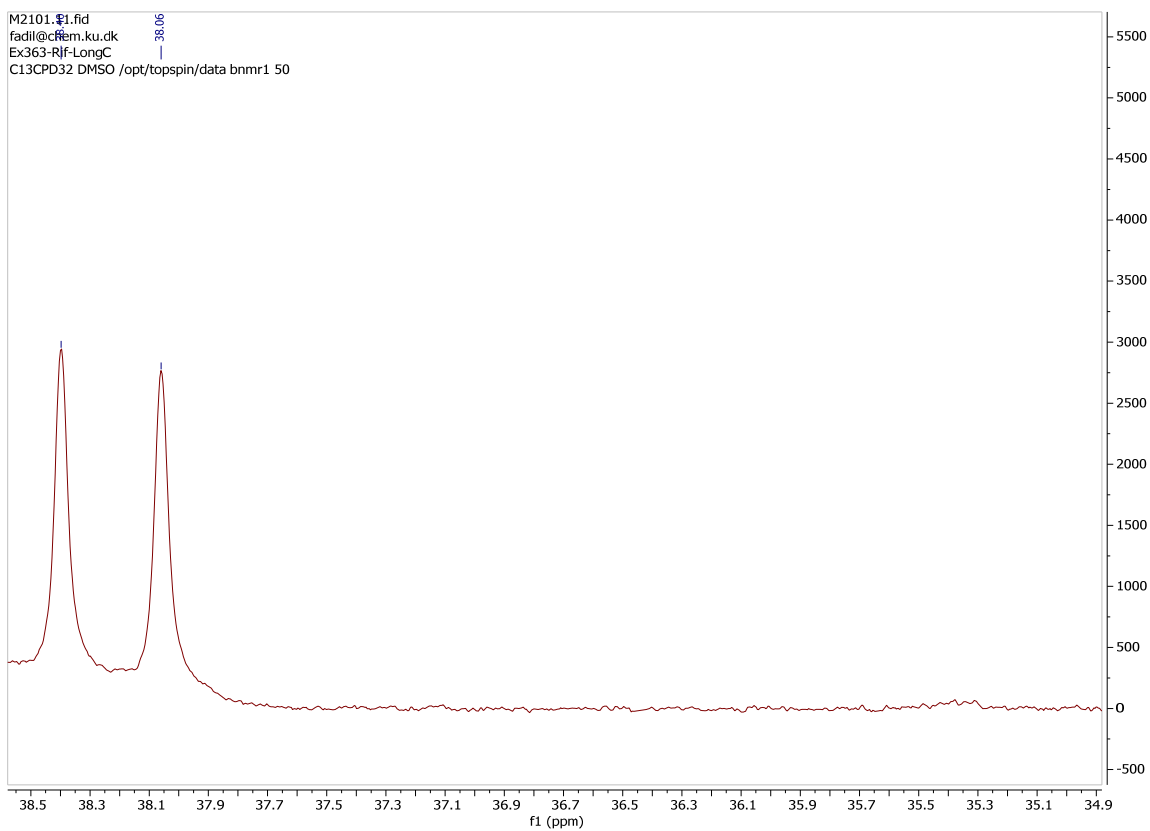

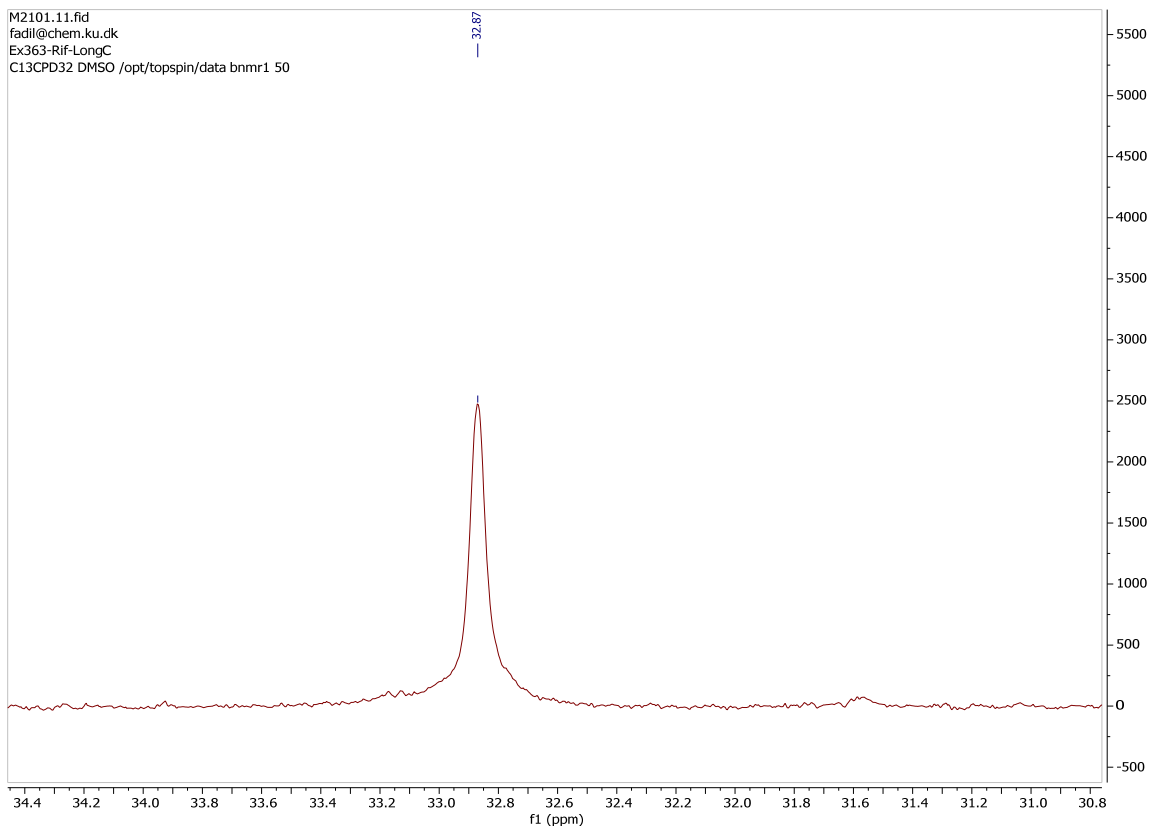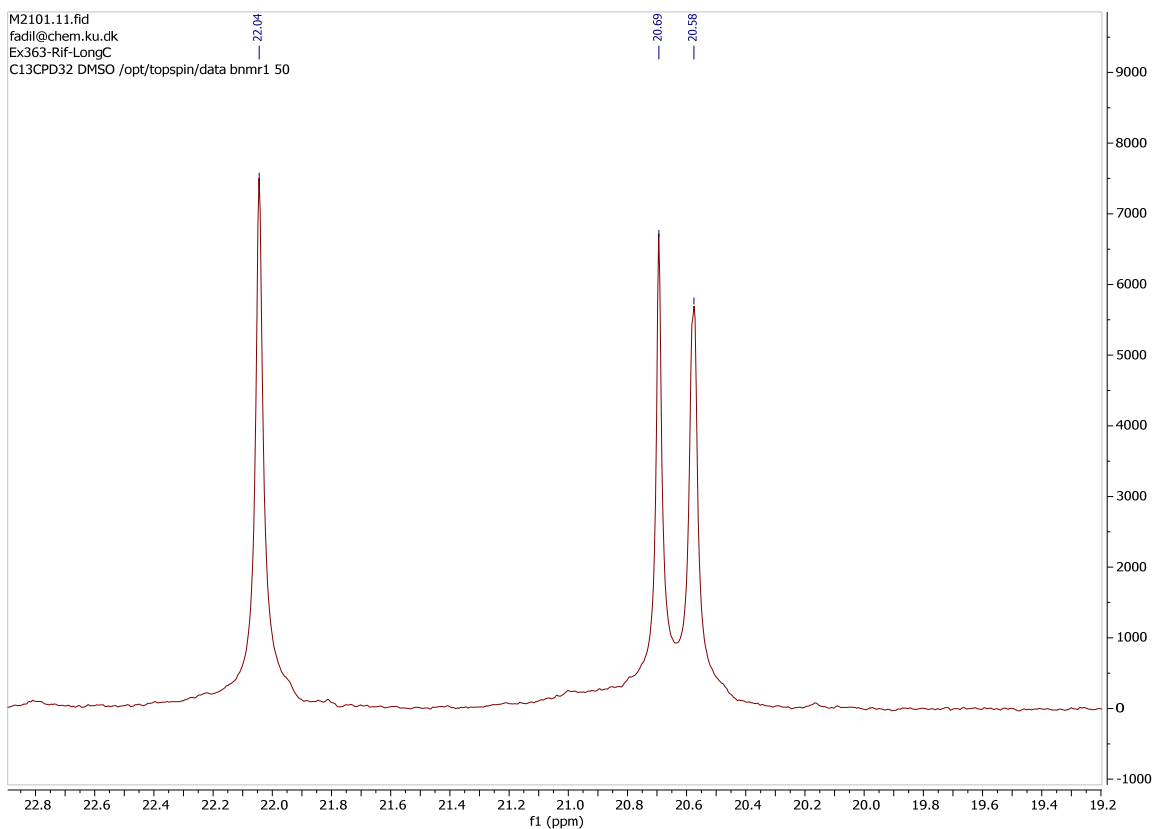

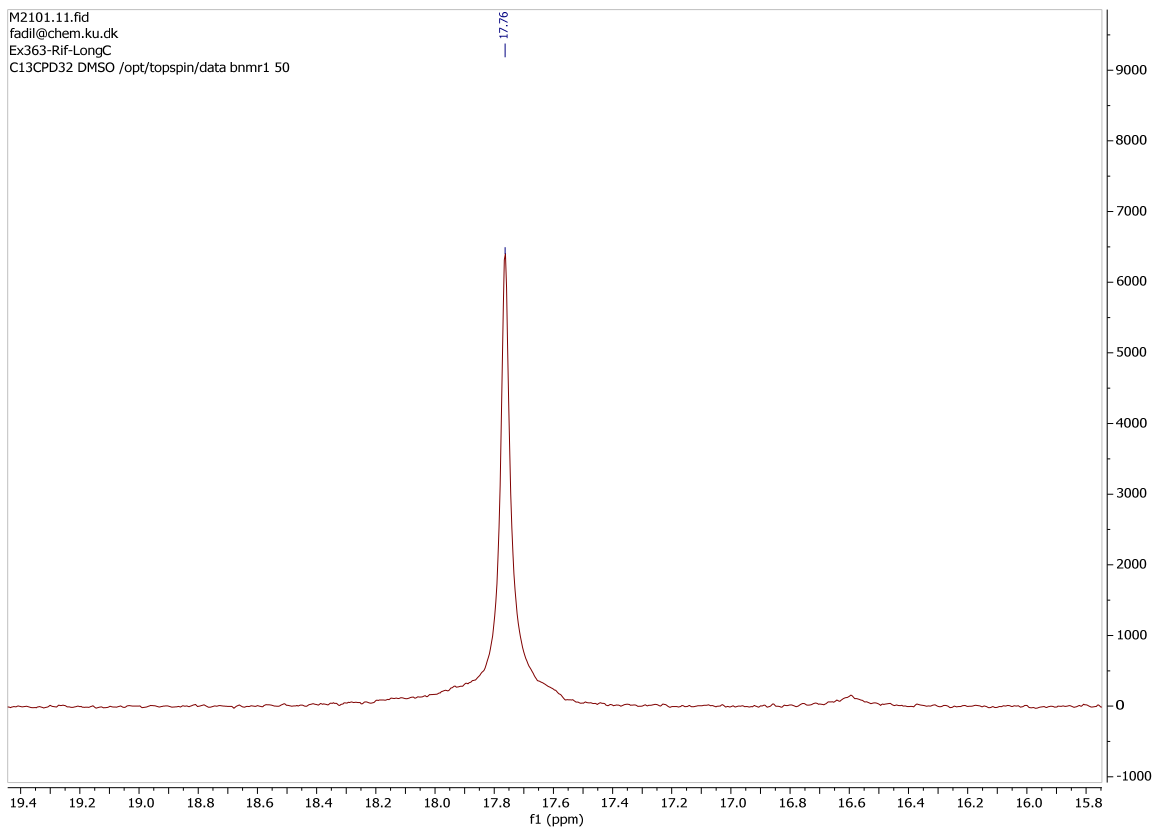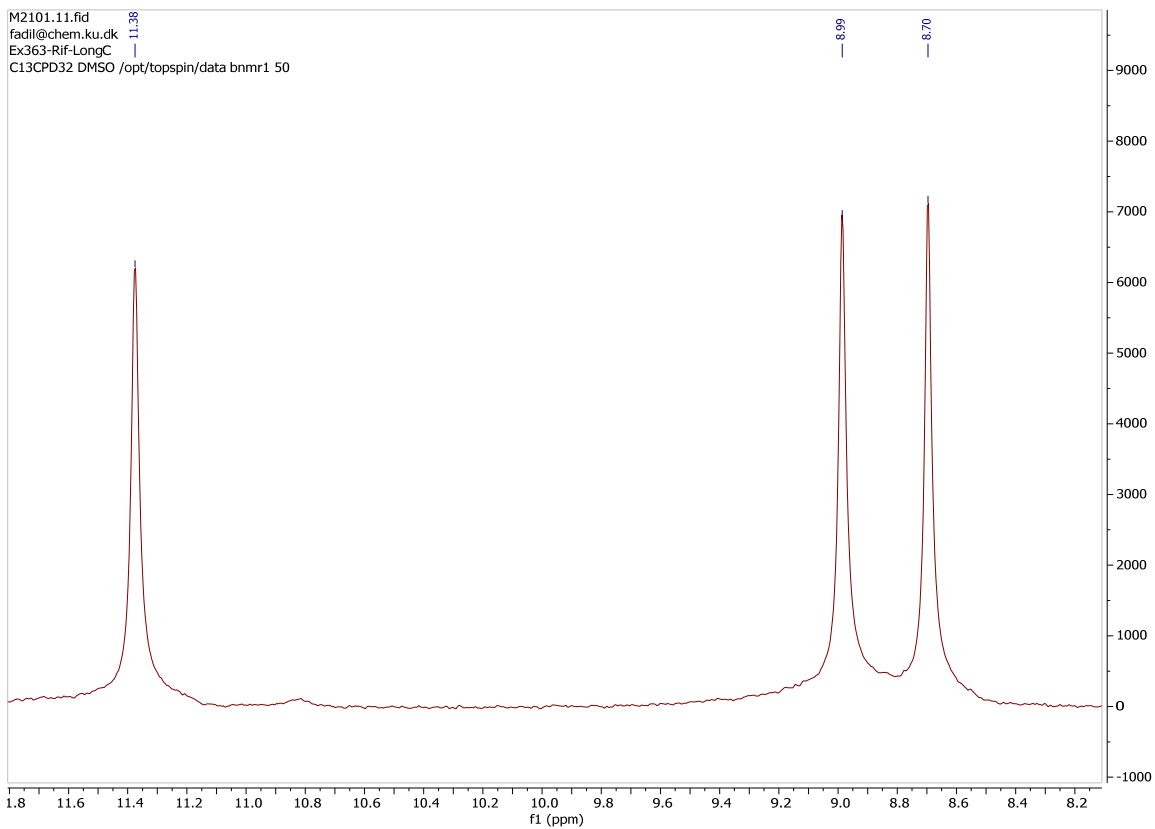

M2101.11.fid  
fadli@chem.ku.dk  
Ex363-Rf-LongC  
C13CPD32 DMSO /opt/topspin/data bnmr1 50

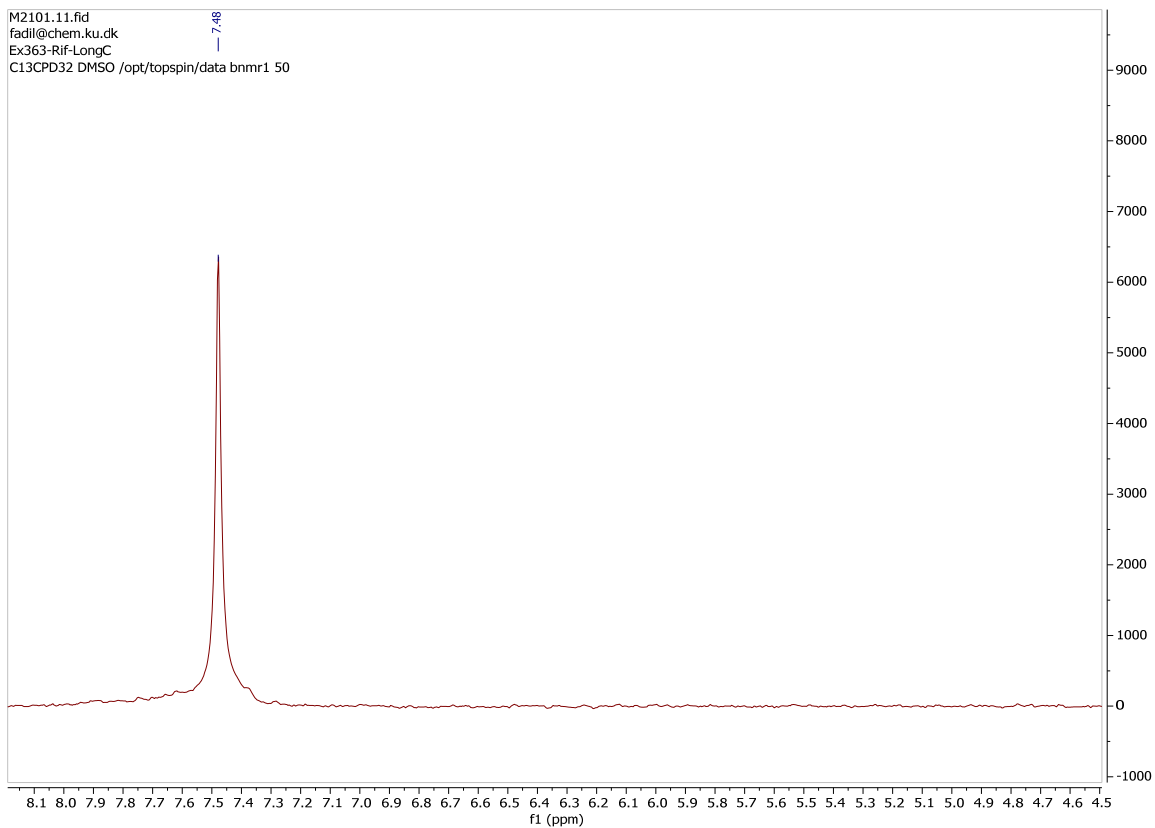

Supplement: s1 [file s1]
